# Supplementary material for: Biocompatible ionic liquid-based nanoparticles for effective skin penetration and intracellular uptake of antisense oligonucleotides
Source: Royal Society of Chemistry journal article supplement (doi:10.1039/d5pm00087d), 2025-01-01
Supplement: d5pm00087d1.pdf [file d5pm00087d1.pdf]

## Supporting Information

### **Biocompatible ionic liquid-based nanoparticles for effective skin penetration and intracellular uptake of antisense oligonucleotides**

Kiyohiro Toyofuku,<sup>a</sup> Rie Wakabayashi,<sup>a,b</sup> Yoshirou Kawaguchi,<sup>a</sup> Noriho Kamiya,<sup>a,b,c</sup> and Masahiro Goto <sup>\*a,b,c</sup>

<sup>a</sup> Department of Applied Chemistry, Graduate School of Engineering, Kyushu University, 744 Motooka, Nishi-ku, Fukuoka 819-0395, Japan.

<sup>b</sup> Advanced Transdermal Drug Delivery System Center, Kyushu University, 744 Motooka, Nishi-ku, Fukuoka 819-0395, Japan.

<sup>c</sup> Division of Biotechnology, Center for Future Chemistry, Kyushu University, 744 Motooka, Nishi-ku, Fukuoka 819-0395, Japan.

\*Corresponding author: Prof. Masahiro Goto. E-mail: m-goto@mail.cstm.kyushu-u.ac.jp; Fax: +81 92 802 2810; Tel: +81 92 802 2806.

#### **TABLE OF CONTENTS**

##### **1. Optimization of reaction conditions**

|                      |       |
|----------------------|-------|
| 1-1. Dilution factor | S2-S3 |
| 1-2. Reaction time   | S3-S4 |

## 1. Optimization of reaction conditions

### 1-1. Reaction time

Formulations were prepared by shaking the reaction time, and carrier formation was confirmed by DLS measurement.

### Experimental manipulation

Trabedersen was selected as the encapsulant and IL [EDMPC][Lin] as the surfactant to prepare the complexes.

(1) Formation of IL-nucleic acid complex: 1 mg of Trabedersen (ssDNA) was dissolved in 5 mL of Milli-Q water. Also, 50 mg of IL [EDMPC][Lin] was dissolved in 1 mL of 99.5% ethanol. These aqueous and ethanol solutions were mixed to form IL-nucleic acid complexes spontaneously by (1) freezing in liquid nitrogen upon addition, (2) stirring with a vortex mixer for 10 seconds, and (3) stirring gently with a stirrer for 10 minutes / (4) 6 hours. All reactions were performed at room temperature.

(2) Removal of internal aqueous and oil phases: The IL-nucleic acid complexes were prepared by freezing the above water/ethanol solution in liquid nitrogen for 20 minutes, and then removing the internal aqueous and oil phases by freeze-drying overnight.

(3) Dispersion in oil: The above surfactant-nucleic acid complex was dispersed in 1 mL of IPM, an oil base with high transdermal penetration promoting effect, to obtain a nucleic acid-incorporated formulation with a final concentration of 1 mg/mL.

(4) The complex solution was diluted 100-fold and particle size and PDI were measured by DLS.

## Results and Discussion

The results of particle size and PDI are shown in Fig. S1.

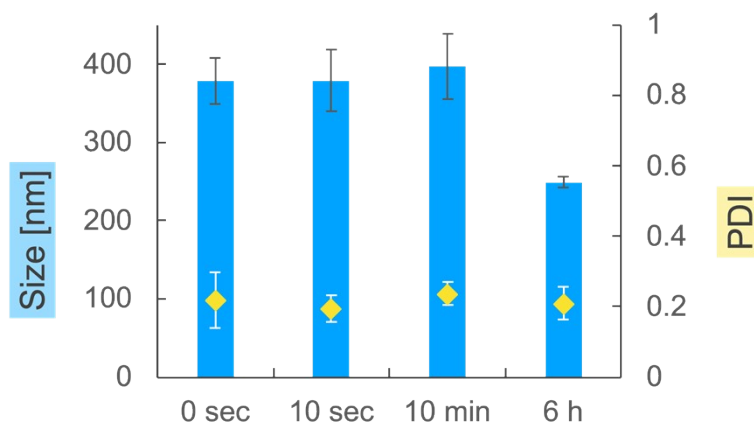

Fig. S1 Reaction time and particle size, PDI.  $N = 3$ , mean  $\pm$  SD.

## 2-2. Dilution factor

In the ethanol dilution method, the water/ethanol ratio (dilution factor) is an important factor. In this section, we examine whether similar complexes are formed when water / ethanol = 1 / 5 or 1 / 10.

### Experimental manipulation

□ Trabedersen was selected as the endosorbent and IL [EDMPC][Lin] was selected as the surfactant to prepare the complexes (Table S1).

(1) Formation of IL-nucleic acid complex: 1 mg of Trabedersen (ssDNA) was dissolved in 5 mL and 10 mL of Milli-Q water. Also, 50 mg of IL [EDMPC][Lin] was dissolved in 1 mL of 99.5% ethanol. These aqueous and ethanol solutions were mixed and stirred gently at room temperature for 6 hours to spontaneously form IL-nucleic acid complexes.

(2) Removal of the inner aqueous and oil phases: The IL-nucleic acid complexes were prepared by freezing the above aqueous/ethanol solutions in liquid nitrogen for 20 minutes, and then removing the inner aqueous and oil phases by placing them in a freeze-drying machine overnight.

(3) Dispersion in oil: The above surfactant-nucleic acid complex was dispersed in 1 mL of IPM, an oil base with high transdermal penetration promoting effect, to obtain a nucleic acid-incorporated formulation with a final concentration of 1 mg/mL. The composition of each sample is shown in Table 3-5.

(4) The complex solution was diluted 100-fold and the particle size and PDI were measured by DLS.

## Results and Discussion

The results of particle size and PDI are shown in Fig. S2.

Table S1. Composition of samples with different dilution ratios (water / ethanol = 1 / 5, 1 / 10)

| Sample     | Trabedersen / Water | Surfactant / Ethanol | IPM  |
|------------|---------------------|----------------------|------|
| W/E = 1/5  | 1 mg / 5mL          | 50 mg / 1mL          | 1 mL |
| W/E = 1/10 | 1 mg / 10mL         | 50 mg / 1mL          | 1 mL |

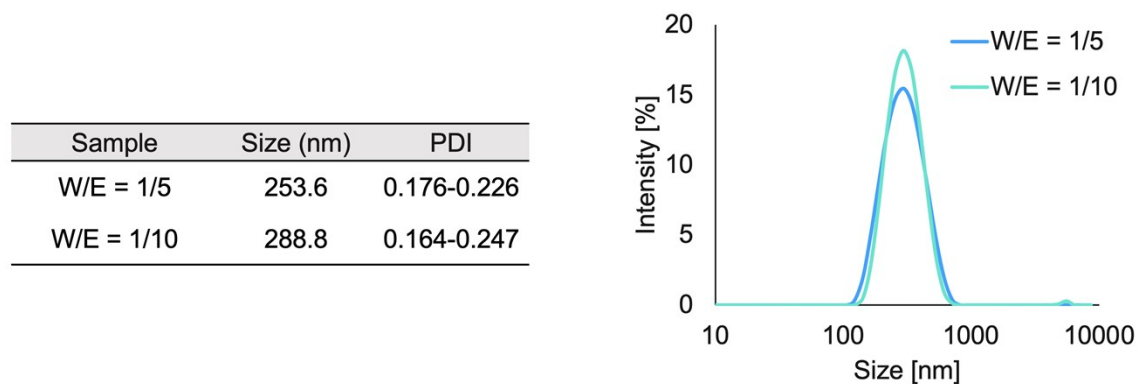

Fig. S2 Dilution Magnification and Particle Size Distribution
